# Supplementary material
Source: bioRxiv or medRxiv preprint supplement (https://www.biorxiv.org/highwire/filestream/77786/field_highwire_adjunct_files/0/217737-1.pdf)
Supplement: Supplementary file [file 217737-1.pdf]

# 849 **Supplementary Material**

## 850 **SUPPLEMENTARY TEXT**

### 851 **Application of kNN-smoothing to scRNA-Seq data of mouse myeloid progenitor cells**

852 To further compare our method to a previously proposed approach (Dijk et al. 2017), we applied our  
853 smoothing algorithm to a scRNA-Seq dataset of mouse myeloid progenitor cells (Paul et al. 2015). We  
854 generated a heatmap of characteristic genes for 19 clusters identified by the authors of the original study, as  
855 well as for important cell surface markers, in a way that allows a direct comparison to the results obtained  
856 by Dijk et al. (2017) (see Figure S6a,b). We found that even though k-nearest neighbor smoothing is  
857 much simpler than their approach, our method performed similarly well in generating smooth expression  
858 profiles for cells belonging to the same cluster, while respecting cluster boundaries.

859 We similarly examined the pairwise correlations of cell surface markers, and obtained qualitatively  
860 similar results to Dijk et al. (2017) (see Figure S6c-e). As in their study, recovering cell type-specific  
861 co-expression patterns depended on the amount of smoothing applied. Some differences were observed in  
862 the precise shapes of the associations, but it was not clear how much of this was due to differences in  
863 normalization and/or scaling used for visualization. In summary, for this particular dataset, the diffusion-  
864 based approach by Dijk et al. (2017) and our algorithm gave qualitatively similar results, although there  
865 were some quantitative differences.

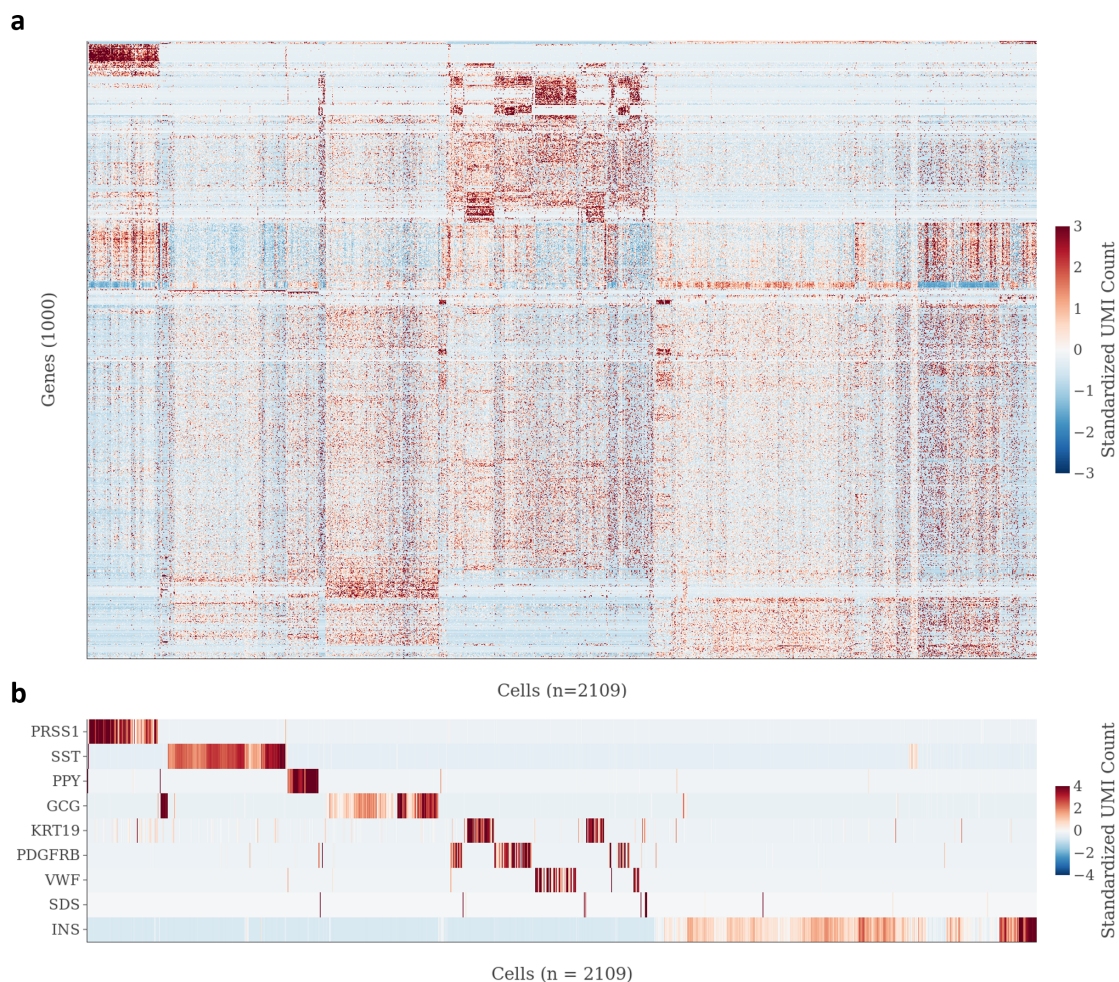

**Figure S1. Hierarchical clustering of unsmoothed scRNA-Seq data from human pancreatic islet tissue.** Shown is the PANCREAS dataset, from a study by Baron et al. (2016). **a** Heatmap showing the results of hierarchical clustering of genes and cells performed on the unsmoothed data, after filtering for the 1,000 most variable genes, as in Figure 4b). **b** Expression of cell type-specific marker genes, as in Figure 4d, but with genes reordered to accommodate the new clustering results.



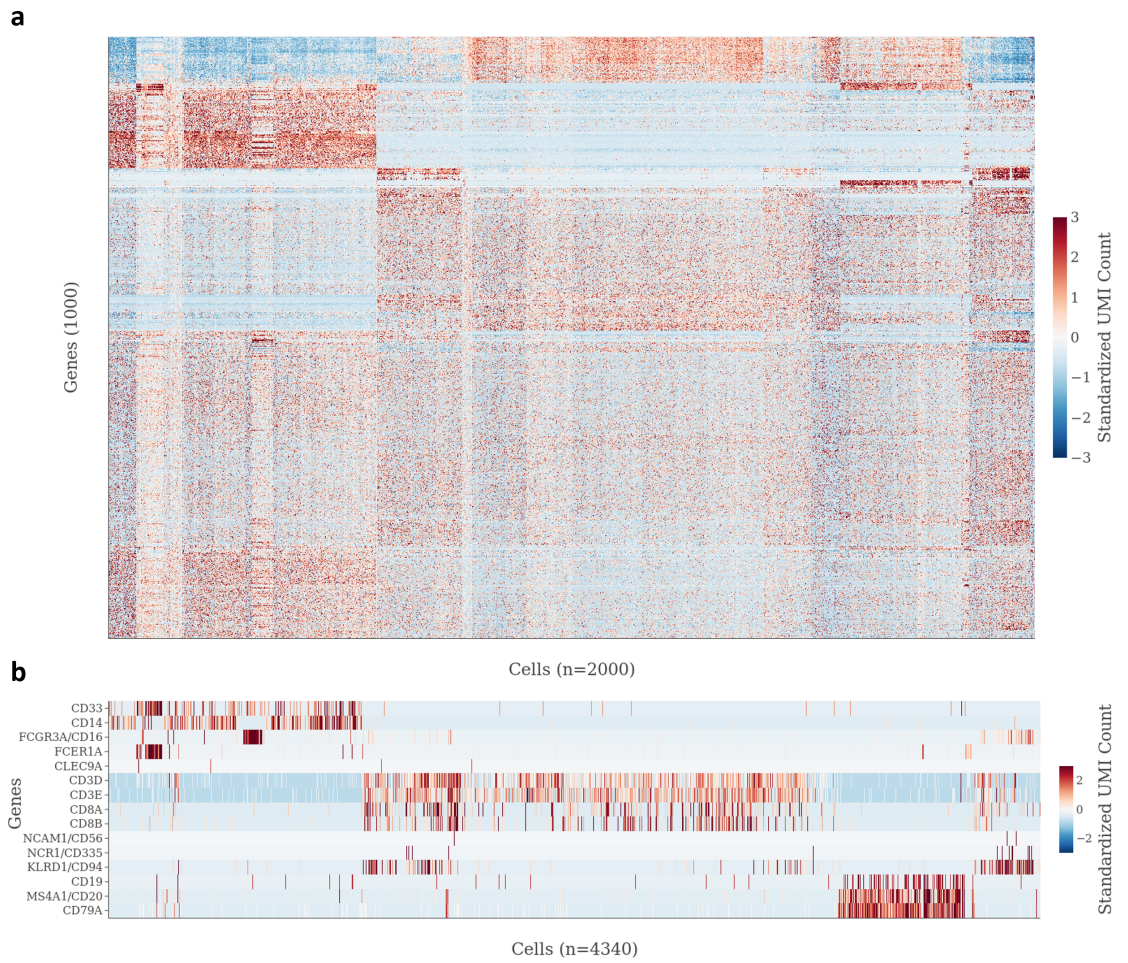

**Figure S2. Hierarchical clustering of unsmoothed scRNA-Seq data from human peripheral blood mononuclear cells.** Shown is the PMBC dataset. **a** Heatmap showing the results of hierarchical clustering of genes and cells performed on the unsmoothed data, after filtering for the 1,000 most variable genes, as in [Figure 5b](#)). **b** Expression of cell type-specific marker genes, as in [Figure 5d](#).

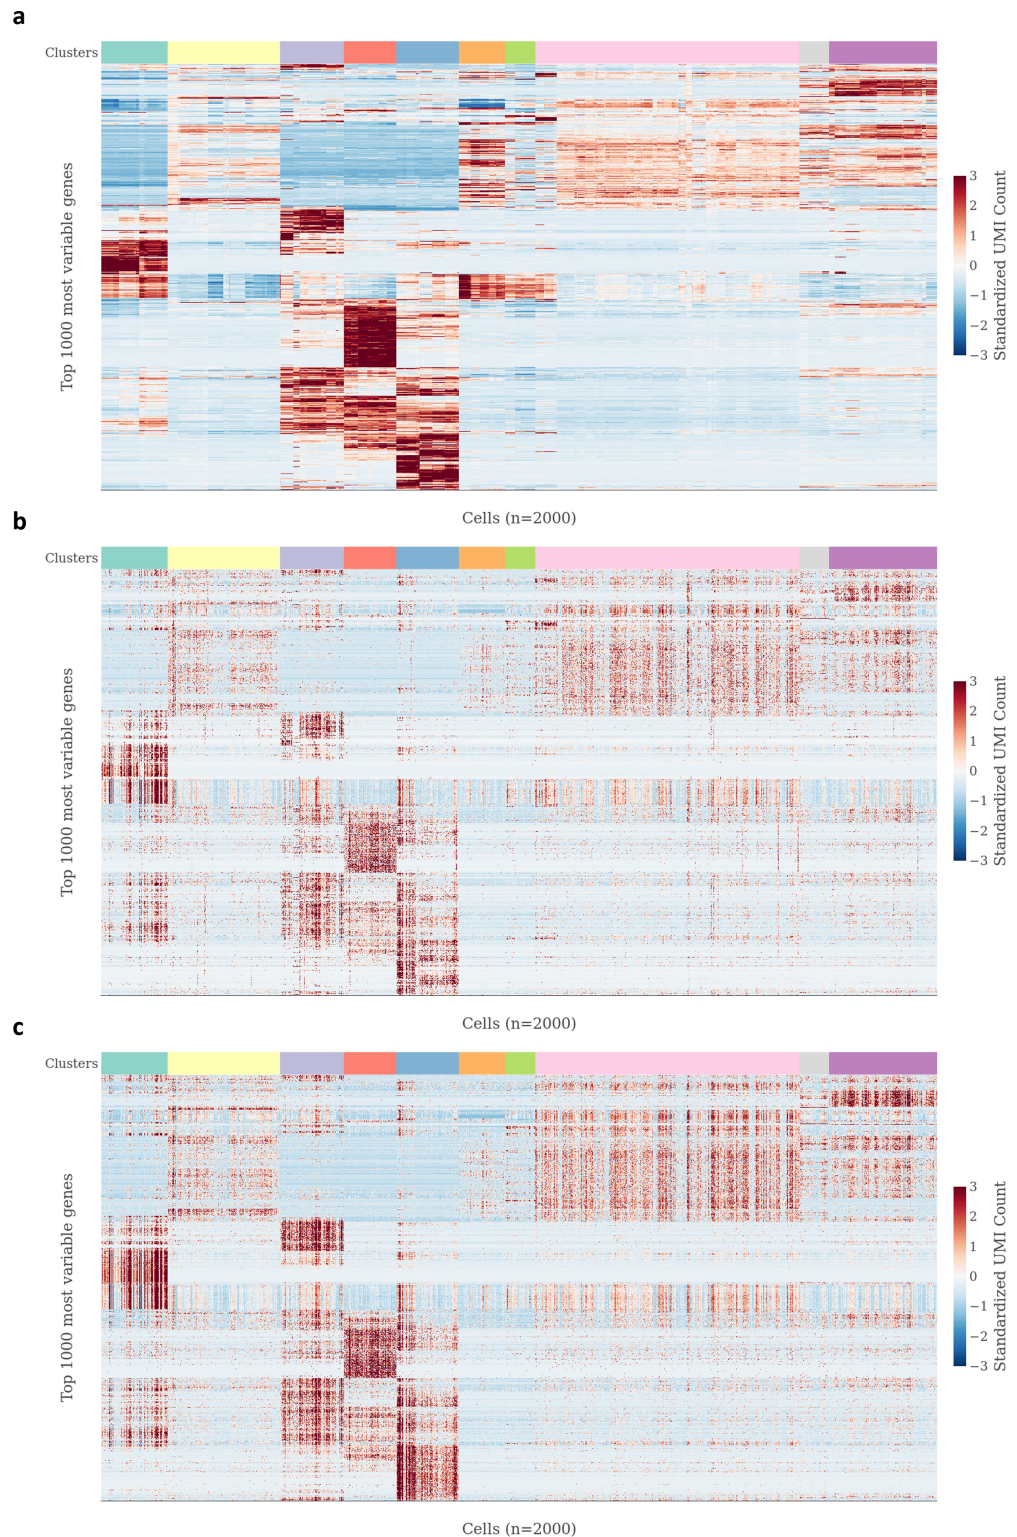

**Figure S3. Comparison of smoothed, unsmoothed, and simulated scRNA-Seq data for human pancreatic islet tissue.** All panels show heatmaps of the 1,000 most variable genes, where genes and cells are ordered according to hierarchical clustering results, obtained using the 2,000 most variable genes in the smoothed PANCREAS data (with  $k=15$ ). Assignments of cells to one of 10 clusters (based on the same hierarchical clustering results) are shown on top of each heatmap. **a** Smoothed data. **b** Unsmoothed data. **c** Simulated data. Only a random subset of 2,000 cells (out of 2,109 cells) is shown in each heatmap.



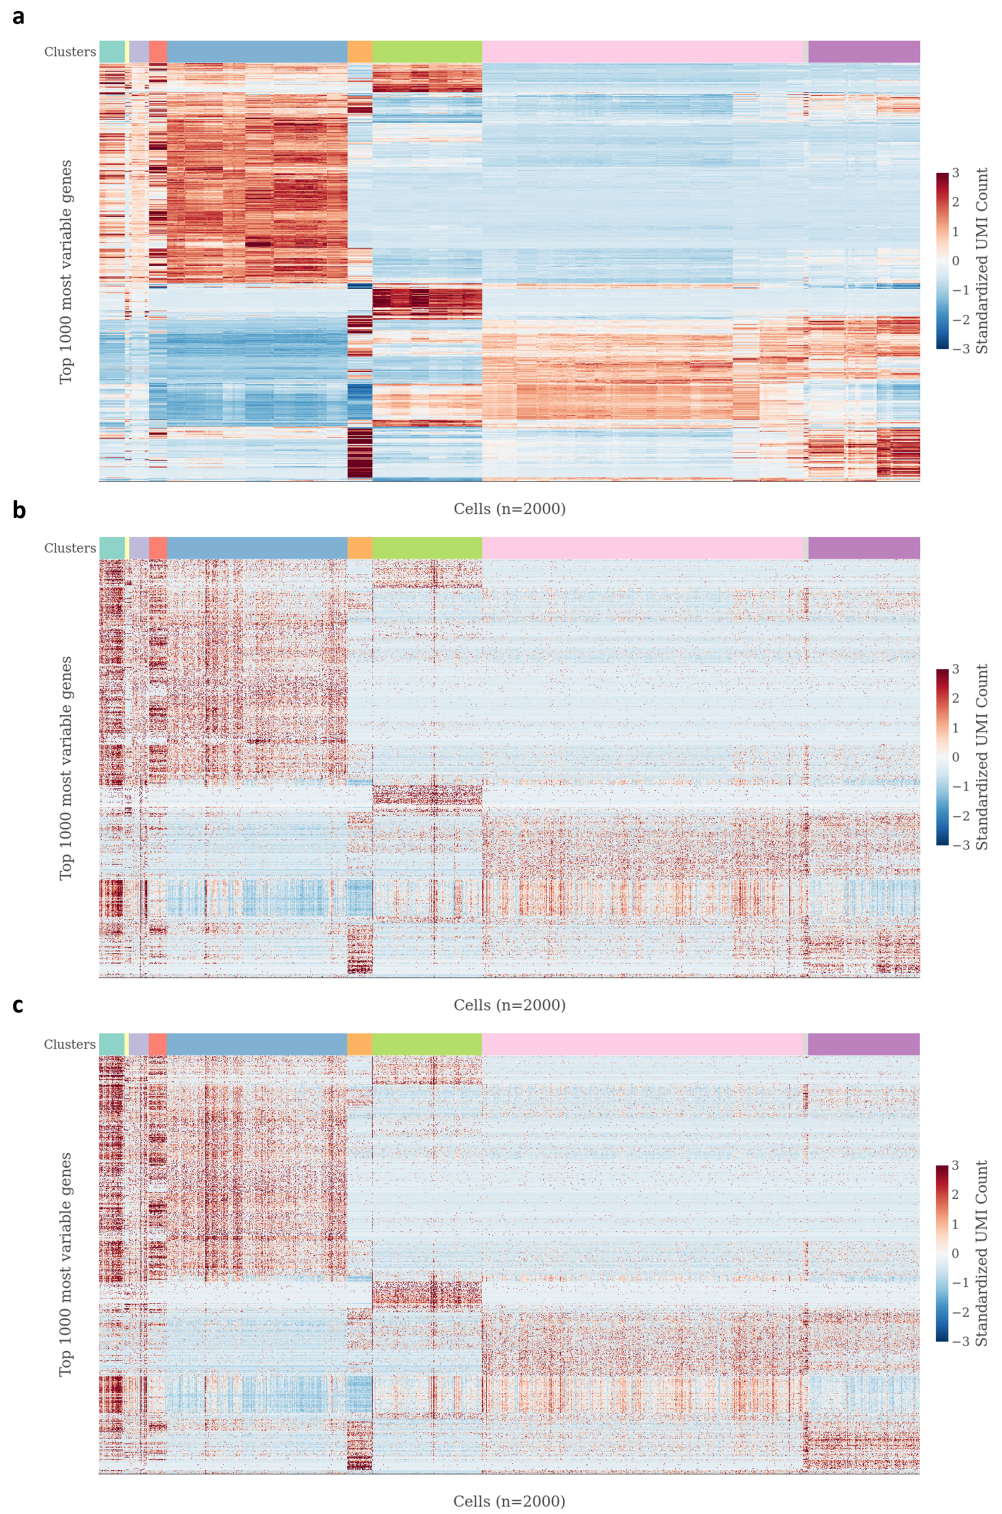

**Figure S4. Comparison of smoothed, unsmoothed, and simulated scRNA-Seq data for human peripheral blood mononuclear cells.** See [Figure S3](#) for descriptions of panels (a)-(c).

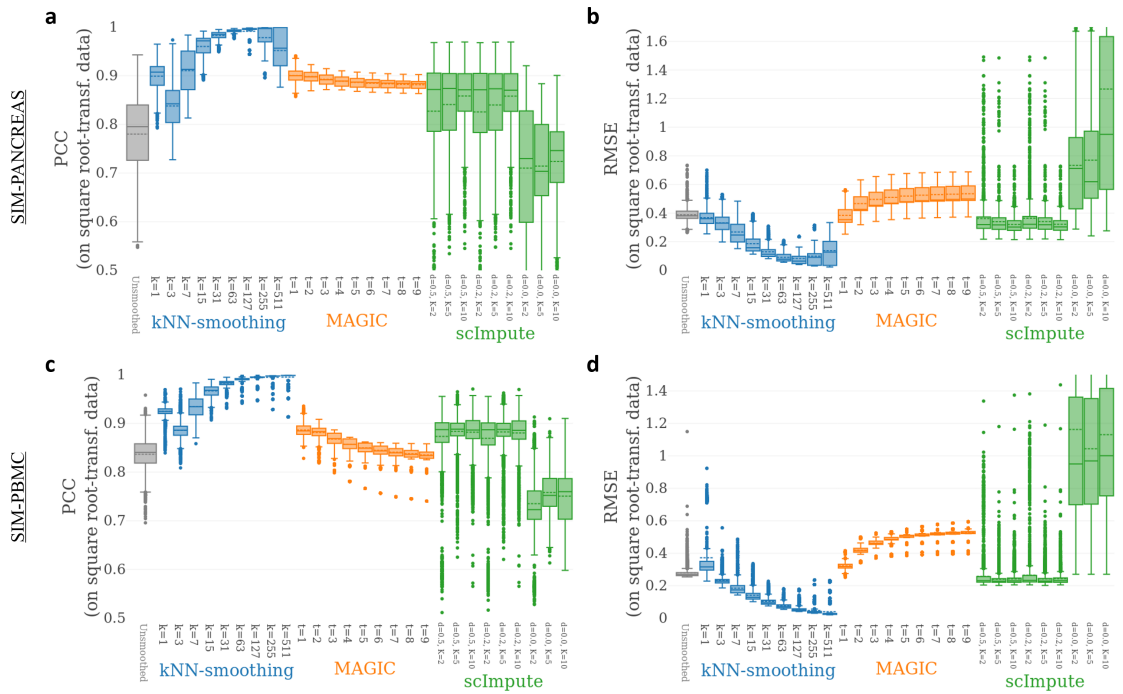

**Figure S5. Accuracy of kNN-smoothing in comparison to other smoothing methods for simulated scRNA-Seq datasets. a, b** Accuracy on SIM-PANCREAS dataset. **c, d.** Accuracy on SIM-PBMC dataset. Figure mirrors Figure 6, but shown are accuracy measures calculated on square root-transformed data, not on  $\log_2$ -transformed data (see Methods for details).



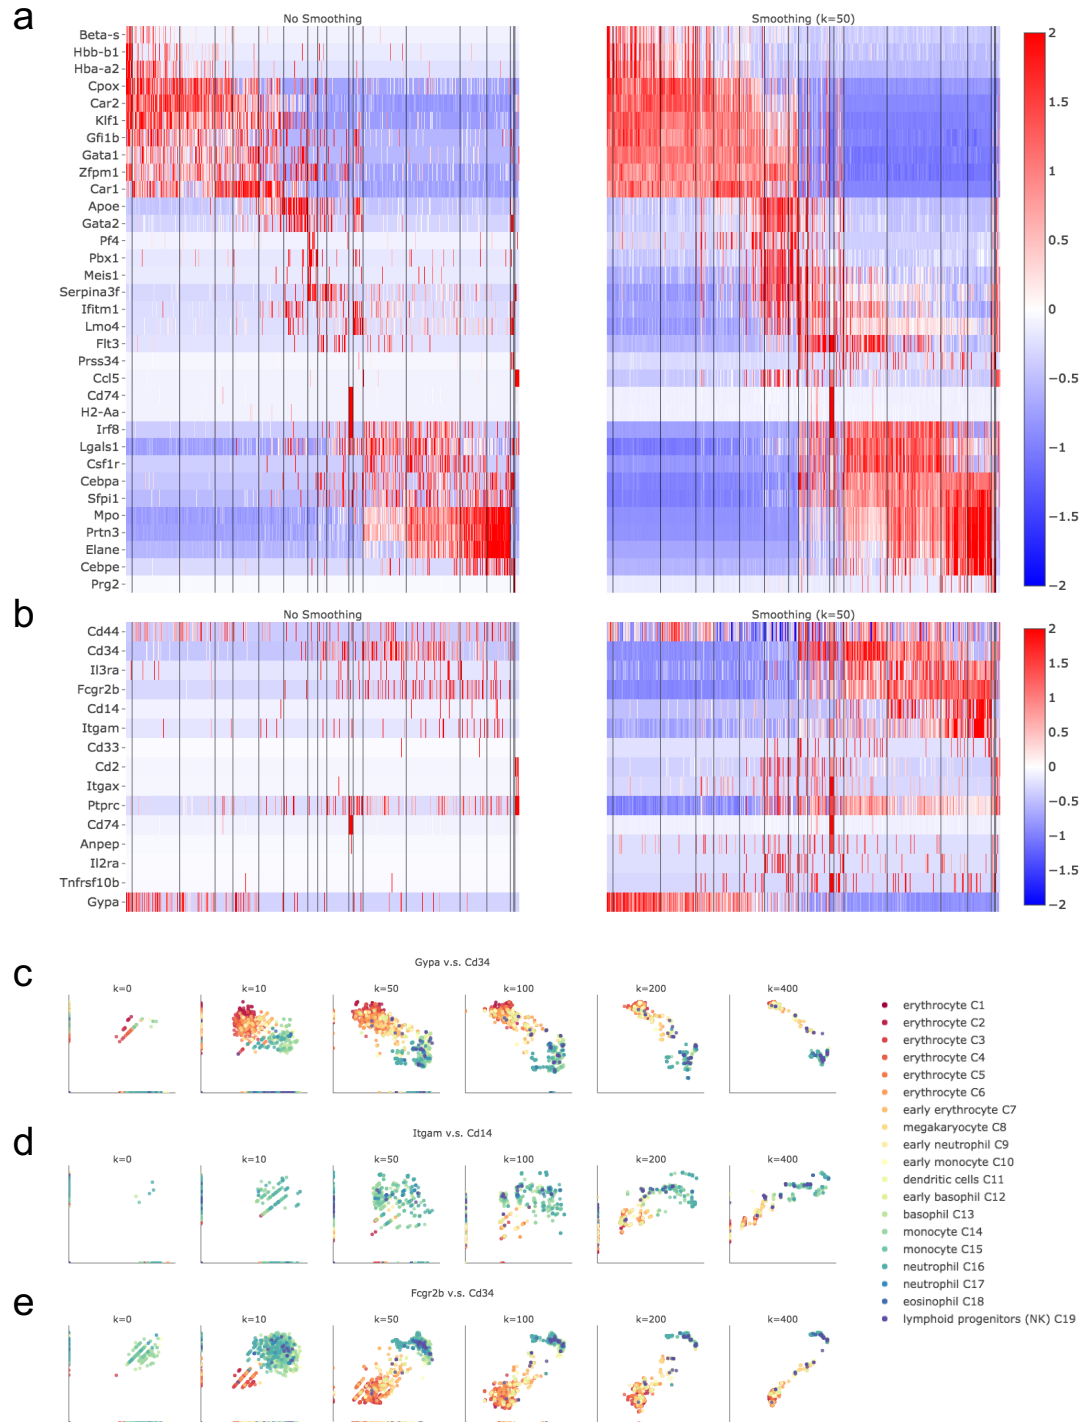

**Figure S6. Application of k-nearest neighbor smoothing to scRNA-Seq data of mouse myeloid progenitors.** This figure is directly comparable to Figure 3 from [Dijk et al. \(2017\)](#). **(a, b)** Heatmaps of the expression matrices for **(a)** 33 key hematopoietic genes, and **(b)** 15 surface marker genes of immune cells, as defined in [Paul et al. \(2015\)](#), before smoothing (left) and after smoothing (right). Gene are ordered as same as shown in [Dijk et al. \(2017\)](#), Figure 3. Cells from left to right are ordered in clusters (C1-C19) as defined in [Paul et al. \(2015\)](#). **c-e)** Scatter plots of expressions showing the recovery of relationships of three pairs of immune marker genes after smoothing with different  $k$  ( $k=0, 10, 50, 100, 200, 400$ ). Each dot is an individual cell colored by the 19 clusters used in **a**. See Methods for details.
